# Supplementary material for: Racial and Ethnic Differences in Multigene Hereditary Cancer Panel Test Results for Women With Breast Cancer
Source: PubMed Central journal article supplement — J Natl Cancer Inst. 2020 Nov 4;113(10):1429–33. doi: 10.1093/jnci/djaa167 (PMC8633452; doi:10.1093/jnci/djaa167), 2020-11-04
Supplement: djaa167_supplementary_data.pdf [file djaa167_supplementary_data.pdf]

## **SUPPLEMENTARY MATERIALS**

### **Supplementary Methods**

#### ***Patient ascertainment:***

Study subjects included women with breast cancer who underwent multigene panel testing between March 2012 and December 2016 at a single diagnostic laboratory (Ambry Genetics, Aliso Viejo, CA). Clinical histories were obtained from clinician-completed test requisition forms and from clinical documentation such as pedigrees and chart notes when provided. Case selection was limited to one individual per family. In the instance where multiple individuals from the same family underwent MGPT, the first family member to undergo panel testing was selected for inclusion in this study. Approximately 90% of women met the National Comprehensive Cancer Network (NCCN) criteria on germline genetic testing (1). Women reporting prior *BRCA1* and *BRCA2* and Lynch syndrome testing were excluded. The present analyses were limited to non-Hispanic Whites, Blacks, Asians, Ashkenazi-Jews and Hispanics and women with missing information on race/ethnicity or mixed ethnicity were excluded.

#### ***The process of race/ethnicity classification:***

Race and ethnicity data were collected from clinician-reported information provided on test requisition forms submitted at the time testing was ordered. To classify ethnicity, categorization of these data was performed referencing the Office of Management and Budget Race and Hispanic Ethnicity Categories (OMB race categories) as defined by the Subcommittee on Standardized Collection of Race/Ethnicity Data for Healthcare Quality Improvement (2). For major race/ethnicity categories, OMB race category and our study ethnicity condensed categories were the same (Supplementary table 1). However, for some race/ethnicity categories with smaller numbers, further condensing was performed referencing the cumulative list of granular ethnicities to determine the appropriate category. With the exception of Ashkenazi Jewish ancestry, ethnicities that could not be classified under the distinct OMB race categories were labeled as 'Other' ethnicity. Although not defined

under the OMB race categories, Ashkenazi Jewish was indicated as an ethnicity condensed category due to known genetic predispositions specific to this population. If clinician-reported race/ethnicity data condensing resulted in multiple OMB race categories, the patient was categorized as having 'Mixed Ethnicity.' When data condensing resulted in both Ashkenazi Jewish and non-Hispanic White categorizations, patients were labeled as 'Ashkenazi Jewish' whereas Ashkenazi Jewish and other ethnicity condensed categories resulted in 'Mixed Ethnicity.' The present analysis was limited to non-Hispanic White, Black, Hispanic, Ashkenazi-Jewish and Asian races/ethnicities. All other categories were excluded.

***Germline genetic testing and variant classification:***

Mutation testing was performed by targeted custom capture and sequencing and targeted chromosomal microarray analysis, as described previously (3, 4). Patients underwent comprehensive germline analysis of 5 to 49 genes depending on the multigene panel ordered. Sanger or next-generation sequencing analysis was performed for all coding domains and well into the flanking 5' and 3' ends of all the introns and untranslated regions. Gross deletion/duplication analysis was performed for all covered exons and untranslated regions. All variants, with the exception of previously characterized benign alterations, underwent thorough assessment and review of available evidence (e.g., population frequency information, published case reports, case-control and functional studies, internal co-occurrence and cosegregation data, evolutionary conservation, and in silico predictions). A 5-tier system was used to classify variants utilizing a framework consistent with the guidelines published by American College of Medical Genetics and Association for Molecular Pathology (5). Pathogenic and likely pathogenic variants were analyzed together as pathogenic variants. All missense variants in *CHEK2* and other low penetrance PVs were excluded from analysis as the risk of breast cancer associated with these variants is undefined or lower compared to deleterious variants in *CHEK2* (3, 4, 6, 7). These included the c.1111C>T, c.1169A>C, c.1283C>T, c.1427C>T, c.349A>G, c.433C>T, c.470T>C, c.499G>A, and c.917G>C variants in *CHEK2*.

***Case-control analysis:***

For each ethnic or racial group, mutation frequencies by gene were compared with mutation frequencies for the same population in Genome Aggregatoin Database (gnomAD) (<http://gnomad.broadinstitute.org/>)(8). The gnomAD is a coalition of investigators seeking to aggregate and harmonize exome and genome sequencing data from a variety of large-scale sequencing projects, and to make summary data available for the wider scientific community. The v2 dataset (GRCh37/hg19) used in this analysis includes 125,748 exome sequences from unrelated individuals sequenced as part of various disease-specific and population genetic studies. For the present analysis, both men and women were included as controls but those with a personal history of cancer were excluded. Ashkenazi Jews were also excluded from this analysis because the population of gnomAD controls in this group was small. East Asians and South Asians in gnomAD were combined to serve as a reference group for Asians. Patients who had undergone testing for *BRCA* or Lynch genes prior to MGPT were excluded from cases. Copy number variations in all genes and gnomAD filter non-PASS variants were excluded from both cases and controls, the rationale and process for which have been described previously (9). Further case-control analysis by estrogen receptor (ER) status was performed by subsetting BC cases to estrogen receptor positive and negative cases while the control population essentially remained the same as in overall analysis.

***Absolute breast cancer risk estimation for each race or ethnicity:***

Absolute risk is the probability an individual with a measured set of risk factors (e.g. pathogenic variant (PV) status) and is disease free at age  $a$  will be diagnosed with the disease in the subsequent  $\tau$  years (10). Let  $Z$  be the set of measured risk factors, then we can express the absolute risk as:

$$R(a, \tau, Z) = \int_a^{a+\tau} h_1(u|Z) \times \exp\left(-\int_a^u \{h_1(v|Z) + h_2(v|Z)\} dv\right) du$$

where  $h_1(a|Z)$  is the conditional disease-specific hazard at age  $a$  and  $h_2(a|Z)$  is the competing risks hazard at age  $a$ . The competing risks may include other diseases or death. The hazards can be parameterized as:

$$h_1(a|Z) = h_{10}(a)\exp(\beta Z)$$

and

$$h_2(a|Z) = h_{20}(a)\exp(\gamma Z)$$

where  $h_{10}(a)$  is the baseline hazard and  $\beta$  and  $\gamma$  represent the relative risks for each risk factor in  $Z$  for the disease of interest and competing risks, respectively. In this analysis,  $\beta$  was estimated in the case-control analysis and we assumed  $\gamma=1$ . The baseline hazards can be estimated by the following relationship between the baseline hazard and the marginal hazard

$$h_1^*(a) = h_{10}(a)E(\exp(\beta Z)) \approx \int h_{10}(a)\exp(\beta z)dF(z)$$

where  $F(Z)$  denotes the distribution of the risk factors in the population. For each age, we solve for  $h_{10}(a)$  by using the expected distribution of the risk factor in the population (11, 12). We estimated race or ethnicity-specific absolute risk for a women at age  $a$  without a diagnosis with any breast cancer, and the risk factor of interest being gene specific PV carrier status, the odds ratio estimates from the Ambry cases versus gnomAD controls were used as estimates for  $\beta$ , and SEER race or ethnicity-specific incidence rates (13) were utilized for the estimation of the baseline hazard combined with the gnomAD PV frequency for the population frequency. In the SEER database, Non-Hispanic Whites, non-Hispanic Blacks and Hispanics were used to estimate the SEER race or ethnicity-specific incidence rates for Caucasians, African Americans and Hispanics respectively. Incidence of breast cancer for Asians were estimated by pooling data from several sub-ethnicities (Chinese, Japanese, Filipino, Hawaiian, Korean, Vietnamese, Laotian, Hmong, Kampuchean, Thai, Asian Indian, Pakistani, Micronesian, Chamorran, Guamanian, Polynesian, Tahitian, Samoan, Tongan, Melanesian, Fiji Islander, New Guinean, Other Asian not otherwise specified (NOS), and Pacific Islander, NOS). The age and

race or ethnicity specific competing events were all cause mortality derived from the CDC WONDER database subset to the same years and states as the corresponding SEER registries.

## References:

1. Genetic/Familial High-Risk Assessment: Breast and Ovarian [Internet]. 2019 [cited 01/29/2019]. Available from: [https://www.nccn.org/professionals/physician\\_gls/pdf/genetics\\_screening.pdf](https://www.nccn.org/professionals/physician_gls/pdf/genetics_screening.pdf).
2. Race, Ethnicity and Language Data: Standardization for Health Care Quality Improvement. Agency for Healthcare Research and Quality, Rockville, MD. Available from: <https://www.ahrq.gov/research/findings/final-reports/iomracereport/index.html> [
3. Shimelis H, LaDuca H, Hu C, Hart SN, Na J, Thomas A, et al. Triple-Negative Breast Cancer Risk Genes Identified by Multigene Hereditary Cancer Panel Testing. *Journal of the National Cancer Institute*. 2018.
4. Couch FJ, Shimelis H, Hu C, Hart SN, Polley EC, Na J, et al. Associations Between Cancer Predisposition Testing Panel Genes and Breast Cancer. *JAMA oncology*. 2017;3(9):1190-6.
5. Richards S, Aziz N, Bale S, Bick D, Das S, Gastier-Foster J, et al. Standards and guidelines for the interpretation of sequence variants: a joint consensus recommendation of the American College of Medical Genetics and Genomics and the Association for Molecular Pathology. *Genetics in medicine : official journal of the American College of Medical Genetics*. 2015;17(5):405-24.
6. Kilpivaara O, Vahteristo P, Falck J, Syrjäkoski K, Eerola H, Easton D, et al. CHEK2 variant I157T may be associated with increased breast cancer risk. *International journal of cancer*. 2004;111(4):543-7.
7. Tung N, Domchek SM, Stadler Z, Nathanson KL, Couch F, Garber JE, et al. Counselling framework for moderate-penetrance cancer-susceptibility mutations. *Nature reviews Clinical oncology*. 2016;13(9):581-8.
8. Lek M, Karczewski KJ, Minikel EV, Samocha KE, Banks E, Fennell T, et al. Analysis of protein-coding genetic variation in 60,706 humans. *Nature*. 2016;536(7616):285-91.
9. Hu C, LaDuca H, Shimelis H, Polley EC, Lilyquist J, Hart SN, et al. Multigene Hereditary Cancer Panels Reveal High-Risk Pancreatic Cancer Susceptibility Genes. *JCO Precision Oncology*. 2018(2):1-28.
10. Gail MH, Brinton LA, Byar DP, Corle DK, Green SB, Schairer C, et al. Projecting individualized probabilities of developing breast cancer for white females who are being examined annually. *Journal of the National Cancer Institute*. 1989;81(24):1879-86.
11. Costantino JP, Gail MH, Pee D, Anderson S, Redmond CK, Benichou J, et al. Validation Studies for Models Projecting the Risk of Invasive and Total Breast Cancer Incidence. *JNCI: Journal of the National Cancer Institute*. 1999;91(18):1541-8.
12. Chatterjee N, Shi J, Garcia-Closas M. Developing and evaluating polygenic risk prediction models for stratified disease prevention. *Nature reviews Genetics*. 2016;17(7):392-406.
13. National Cancer Institute, DCCPS, Surveillance Research Program, Surveillance Systems Branch. Surveillance, Epidemiology, and End Results (SEER) Program Research Data (2010-2015). <https://www.seer.cancer.gov>. April 2018 (Based on November 2017 Submission).

## Supplementary Tables

Supplementary Table 1: Comparison of OMB race category and study ethnicity condensed category

| OMB Race Category                         | Study Ethnicity Condensed Category                                                                                                  |
|-------------------------------------------|-------------------------------------------------------------------------------------------------------------------------------------|
| Asian                                     | Asian                                                                                                                               |
| Black or African American                 | Black                                                                                                                               |
| Native Hawaiian or Other Pacific Islander | Asian                                                                                                                               |
| White                                     | Non-Hispanic White                                                                                                                  |
| American Indian or Alaska Native          | Native American, Alaska Native                                                                                                      |
| No determinate OMB race classification    | Other (e.g., Brazilian)                                                                                                             |
| Hispanic or Latino                        | Hispanic                                                                                                                            |
| Other ethnicity                           | Other                                                                                                                               |
| Middle Eastern or North African           | Middle Eastern                                                                                                                      |
| --                                        | Ashkenazi Jewish                                                                                                                    |
| --                                        | Mixed ethnicity (if multiple of the above categories, with the exception of non-Hispanic White/Ashkenazi Jewish = Ashkenazi Jewish) |

OMB: Office of Management and Budget

Supplementary Table 2: Characteristics of breast cancer patients from racial and ethnic groups

|                                       | Non-Hispanic White |      | Ashkenazi-Jewish |      | Black       |      | Hispanic    |      | Asian       |      |
|---------------------------------------|--------------------|------|------------------|------|-------------|------|-------------|------|-------------|------|
|                                       | n                  | %    | n                | %    | n           | %    | n           | %    | n           | %    |
| Total patients                        | 57003              |      | 4798             |      | 6722        |      | 5194        |      | 4183        |      |
| Age at testing (years)                |                    |      |                  |      |             |      |             |      |             |      |
| mean (SD)                             | 55.4 (12.1)        |      | 58.9 (12.1)      |      | 50.8 (11.8) |      | 49.6 (11.4) |      | 49.0 (11.3) |      |
| <30                                   | 609                | 1.1  | 39               | 0.8  | 166         | 2.5  | 131         | 2.5  | 90          | 2.2  |
| 30-39                                 | 4488               | 7.9  | 223              | 4.6  | 977         | 14.5 | 791         | 15.2 | 689         | 16.5 |
| 40-49                                 | 14132              | 24.8 | 850              | 17.7 | 2101        | 31.3 | 1902        | 36.6 | 1702        | 40.7 |
| 50-59                                 | 16472              | 28.9 | 1280             | 26.7 | 1888        | 28.1 | 1363        | 26.2 | 930         | 22.2 |
| >59                                   | 21301              | 37.4 | 2406             | 50.1 | 1590        | 23.7 | 1007        | 19.4 | 772         | 18.5 |
| Personal History of Cancer            |                    |      |                  |      |             |      |             |      |             |      |
| Age at breast cancer diagnosis        |                    |      |                  |      |             |      |             |      |             |      |
| mean (SD)                             | 50.2 (11.4)        |      | 52.5 (11.6)      |      | 47.0 (11.2) |      | 46.2 (10.7) |      | 45.5 (10.2) |      |
| dx ≤36                                | 5972               | 10.5 | 346              | 7.2  | 1194        | 17.8 | 888         | 17.1 | 752         | 18.0 |
| dx ≤45                                | 21040              | 36.9 | 1395             | 29.1 | 3232        | 48.1 | 2717        | 52.3 | 2364        | 56.5 |
| dx ≤50                                | 32228              | 56.5 | 2298             | 47.9 | 4420        | 65.8 | 3718        | 71.6 | 3187        | 76.2 |
| dx ≤60                                | 46214              | 81.1 | 3593             | 74.9 | 5878        | 87.4 | 4651        | 89.5 | 3802        | 90.9 |
| dx >60                                | 10789              | 18.9 | 1205             | 25.1 | 844         | 12.6 | 543         | 10.5 | 381         | 9.1  |
| Multiple Breast Cancer                |                    |      |                  |      |             |      |             |      |             |      |
| No                                    | 48717              | 85.5 | 4041             | 84.2 | 5808        | 86.4 | 4683        | 90.2 | 3685        | 88.1 |
| Not provided                          | 191                | 0.3  | 17               | 0.4  | 24          | 0.4  | 48          | 0.9  | 15          | 0.4  |
| Yes                                   | 8095               | 14.2 | 740              | 15.4 | 890         | 13.2 | 463         | 8.9  | 483         | 11.5 |
| TNBC                                  | 6367               | 11.2 | 340              | 7.1  | 1586        | 23.6 | 743         | 14.3 | 420         | 10.0 |
| ER status                             |                    |      |                  |      |             |      |             |      |             |      |
| Negative                              | 9305               | 16.3 | 530              | 11.0 | 1994        | 29.7 | 1040        | 20.0 | 671         | 16.0 |
| Not provided                          | 17601              | 30.9 | 1804             | 37.6 | 1802        | 26.8 | 1620        | 31.2 | 1145        | 27.4 |
| Positive                              | 30097              | 52.8 | 2464             | 51.4 | 2926        | 43.5 | 2534        | 48.8 | 2367        | 56.6 |
| Ovarian                               | 1206               | 2.1  | 78               | 1.6  | 79          | 1.2  | 61          | 1.2  | 56          | 1.3  |
| Family History of Cancer <sup>§</sup> |                    |      |                  |      |             |      |             |      |             |      |
| Breast (no ovarian)                   | 31820              | 58.2 | 2728             | 58.9 | 3384        | 53.7 | 2108        | 44.5 | 1550        | 41.4 |
| Breast & Ovarian                      | 4859               | 8.9  | 307              | 6.6  | 455         | 7.2  | 328         | 6.9  | 203         | 5.4  |
| Ovarian (no breast)                   | 2651               | 4.8  | 202              | 4.4  | 297         | 4.7  | 278         | 5.9  | 191         | 5.1  |
| No family history <sup>#</sup>        | 9684               | 17.7 | 830              | 17.9 | 1620        | 25.7 | 1523        | 32.2 | 1364        | 36.4 |
| Not provided                          | 2334               | 4.1  | 169              | 3.5  | 416         | 6.2  | 458         | 8.8  | 438         | 10.5 |

<sup>#</sup>No family history of breast, ovarian, colorectal, pancreatic and endometrial cancer in 1<sup>st</sup> or 2<sup>nd</sup> degree relatives

<sup>§</sup>Family history analysis is subset to individuals who provided information on family history of cancer

Supplementary Table 3: Gene-based frequency of variants of uncertain significance<sup>#</sup>

| Genes                              | Non-Hispanic White |                   | Ashkenazi-Jewish |                   | Black          |                   | Hispanic       |                   | Asian          |                   |
|------------------------------------|--------------------|-------------------|------------------|-------------------|----------------|-------------------|----------------|-------------------|----------------|-------------------|
|                                    | Women with VUS     | VUS frequency (%) | Women with VUS   | VUS frequency (%) | Women with VUS | VUS frequency (%) | Women with VUS | VUS frequency (%) | Women with VUS | VUS frequency (%) |
| Breast Cancer Predisposition Genes |                    |                   |                  |                   |                |                   |                |                   |                |                   |
| <i>ATM</i>                         | 1288               | 3.80              | 76               | 3.80              | 361            | 8.70              | 163            | 5.30              | 141            | 5.60              |
| <i>BARD1</i>                       | 365                | 1.20              | 25               | 1.30              | 60             | 1.60              | 31             | 1.1               | 63             | 2.70              |
| <i>BRCA1</i>                       | 368                | 0.80              | 13               | 0.50              | 115            | 2.10              | 55             | 1.30              | 100            | 3.00              |
| <i>BRCA2</i>                       | 760                | 1.80              | 14               | 0.60              | 226            | 4.00              | 131            | 3.20              | 154            | 4.70              |
| <i>BRIP1</i>                       | 475                | 1.50              | 32               | 1.70              | 67             | 1.80              | 48             | 1.70              | 71             | 3.00              |
| <i>CDHI</i>                        | 313                | 0.70              | 9                | 0.40              | 70             | 1.30              | 51             | 1.30              | 57             | 1.80              |
| <i>CHEK2</i>                       | 597                | 1.80              | 46               | 2.30              | 43             | 1.00              | 87             | 2.80              | 48             | 1.90              |
| <i>PALB2</i>                       | 475                | 1.30              | 20               | 0.90              | 81             | 1.80              | 41             | 1.20              | 81             | 1.80              |
| <i>PTEN</i>                        | 407                | 0.90              | 19               | 0.80              | 99             | 1.80              | 63             | 1.50              | 59             | 1.80              |
| <i>RAD51C</i>                      | 399                | 1.30              | 16               | 0.80              | 41             | 1.10              | 15             | 0.50              | 13             | 0.50              |
| <i>RAD51D</i>                      | 173                | 0.60              | 3                | 0.20              | 34             | 0.90              | 14             | 0.50              | 24             | 1.00              |
| <i>TP53</i>                        | 175                | 0.40              | 10               | 0.40              | 27             | 0.50              | 17             | 0.40              | 39             | 1.20              |
| Total frequency <sup>§</sup>       |                    | 16.1              |                  | 13.7              |                | 26.6              |                | 20.8              |                | 29                |
| Other cancer predisposition genes  |                    |                   |                  |                   |                |                   |                |                   |                |                   |
| <i>CDKN2A</i>                      | 33                 | 0.30              | 1                | 0.10              | 12             | 1.10              | 6              | 0.80              | 10             | 1.50              |
| <i>MLH1</i>                        | 159                | 0.80              | 13               | 1.00              | 26             | 1.20              | 15             | 0.90              | 30             | 2.00              |
| <i>MRE11A</i>                      | 369                | 1.20              | 10               | 0.50              | 66             | 1.80              | 39             | 1.40              | 29             | 1.20              |
| <i>MSH2</i>                        | 308                | 1.60              | 15               | 1.20              | 53             | 2.50              | 26             | 1.60              | 35             | 2.40              |
| <i>MSH6</i>                        | 350                | 1.80              | 17               | 1.30              | 78             | 3.70              | 31             | 1.90              | 53             | 3.60              |
| <i>NBN</i>                         | 371                | 1.20              | 23               | 1.20              | 129            | 3.40              | 44             | 1.60              | 57             | 2.40              |
| <i>NF1</i>                         | 461                | 1.50              | 30               | 1.60              | 61             | 1.60              | 48             | 1.70              | 53             | 2.30              |
| <i>PMS2</i>                        | 275                | 1.40              | 16               | 1.20              | 72             | 3.40              | 42             | 2.60              | 52             | 3.50              |
| <i>RAD50</i>                       | 482                | 1.50              | 28               | 1.50              | 118            | 3.10              | 56             | 2.00              | 122            | 5.20              |

VUS: variants of uncertain significance;

<sup>#</sup>: Breast cancer patients reporting prior *BRCA1* and *BRCA2* and Lynch syndrome testing were excluded. VUS frequencies are reported per subject for each gene.

<sup>§</sup>: Total frequency is a sum of PV frequency across all breast cancer predisposition genes.



Supplementary Table 4: Frequency of PVs in other cancer predisposition genes in different racial and ethnic groups

|               | Non Hispanic White | Ashkenazi-Jewish | Black     | Hispanic | Asian    |
|---------------|--------------------|------------------|-----------|----------|----------|
|               | PV (%)             | PV (%)           | PV (%)    | PV (%)   | PV (%)   |
| <i>CDKN2A</i> | 15 (0.1%)          | 0 (0.0%)         | 1 (0.1%)  | 0 (0.0%) | 0 (0.0%) |
| <i>MLH1</i>   | 17 (0.1%)          | 0 (0.0%)         | 1 (0.0%)  | 2 (0.1%) | 4 (0.3%) |
| <i>MRE11A</i> | 41 (0.1%)          | 1 (0.1%)         | 11 (0.3%) | 1 (0.0%) | 4 (0.2%) |
| <i>MSH2</i>   | 16 (0.1%)          | 3 (0.2%)         | 1 (0.0%)  | 3 (0.2%) | 1 (0.1%) |
| <i>MSH6</i>   | 60 (0.3%)          | 5 (0.4%)         | 4 (0.2%)  | 2 (0.1%) | 0 (0.0%) |
| <i>NBN</i>    | 74 (0.2%)          | 4 (0.2%)         | 1 (0.0%)  | 4 (0.1%) | 2 (0.1%) |
| <i>NF1</i>    | 45 (0.1%)          | 3 (0.2%)         | 10 (0.3%) | 3 (0.1%) | 2 (0.1%) |
| <i>PMS2</i>   | 71 (0.4%)          | 2 (0.2%)         | 7 (0.3%)  | 4 (0.2%) | 4 (0.3%) |
| <i>RAD50</i>  | 98 (0.3%)          | 3 (0.2%)         | 10 (0.3%) | 8 (0.3%) | 7 (0.3%) |

PV: Pathogenic Variant;

Supplementary Table 5: Odds ratios for breast cancer risk for different ethnicities/races compared to ethnicity/race-matched controls in gnomAD<sup>#</sup>

| Gene               | Odds Ratio | 95% Confidence Interval | Adjusted p-value <sup>€</sup> | Cases <sup>§</sup> |                     |                     | Controls        |                     |                     |
|--------------------|------------|-------------------------|-------------------------------|--------------------|---------------------|---------------------|-----------------|---------------------|---------------------|
|                    |            |                         |                               | PV Allele Count    | Total Allele Number | PV Allele Frequency | PV Allele Count | Total Allele Number | PV Allele Frequency |
| Non-Hispanic White |            |                         |                               |                    |                     |                     |                 |                     |                     |
| <i>ATM</i>         | 2.83       | 2.4-3.35                | 2.01e-36                      | 404                | 67204               | 0.6%                | 218             | 102301              | 0.21%               |
| <i>BARD1</i>       | 2.47       | 1.68-3.67               | 5.73e-06                      | 68                 | 63068               | 0.11%               | 44              | 100573              | 0.04%               |
| <i>BRCA1</i>       | 7.34       | 5.97-9.08               | 1.18e-115                     | 643                | 86848               | 0.74%               | 104             | 102451              | 0.1%                |
| <i>BRCA2</i>       | 5.9        | 4.96-7.03               | 1.1e-122                      | 782                | 86848               | 0.9%                | 156             | 101445              | 0.15%               |
| <i>BRIP1</i>       | 1.45       | 1.1-1.92                | 0.013                         | 96                 | 63250               | 0.15%               | 107             | 102403              | 0.1%                |
| <i>CDH1</i>        | 4.9        | 2.01-12.22              | 0.000163                      | 25                 | 84752               | 0.03%               | 6               | 99702               | 0.01%               |
| <i>CDKN2A</i>      | 7.56       | 2.84-20.71              | 3.98e-05                      | 12                 | 21890               | 0.05%               | 7               | 96453               | 0.01%               |
| <i>CHEK2*</i>      | 2.3        | 2-2.64                  | 6.88e-32                      | 503                | 67098               | 0.75%               | 331             | 101013              | 0.33%               |
| <i>MLH1</i>        | 2.1        | 0.97-4.61               | 0.07                          | 13                 | 39538               | 0.03%               | 16              | 102283              | 0.02%               |
| <i>MRE11A</i>      | 1.29       | 0.82-2.04               | 0.313                         | 35                 | 63068               | 0.06%               | 44              | 102368              | 0.04%               |
| <i>MSH2</i>        | 2.13       | 0.9-5.01                | 0.104                         | 10                 | 39538               | 0.03%               | 12              | 101268              | 0.01%               |
| <i>MSH6</i>        | 2.37       | 1.62-3.47               | 1.58e-05                      | 54                 | 39538               | 0.14%               | 58              | 100774              | 0.06%               |
| <i>NBN</i>         | 1.62       | 1.15-2.28               | 0.00922                       | 68                 | 63068               | 0.11%               | 68              | 102072              | 0.07%               |
| <i>NF1</i>         | 3.91       | 2.21-7.04               | 2.11e-06                      | 40                 | 61306               | 0.07%               | 17              | 101782              | 0.02%               |
| <i>PALB2</i>       | 4.74       | 3.71-6.08               | 1.63e-42                      | 278                | 70970               | 0.39%               | 85              | 102504              | 0.08%               |
| <i>PTEN</i>        | ND         | ND                      | ND                            | 26                 | 87280               | 0.03%               | 4               | 101599              | 0%                  |
| <i>RAD50</i>       | 1.09       | 0.82-1.45               | 0.562                         | 81                 | 63068               | 0.13%               | 120             | 101953              | 0.12%               |
| <i>RAD51C</i>      | 1.45       | 0.99-2.15               | 0.07                          | 51                 | 63250               | 0.08%               | 57              | 102515              | 0.06%               |
| <i>RAD51D</i>      | 1.8        | 1.04-3.16               | 0.0584                        | 27                 | 61488               | 0.04%               | 25              | 102346              | 0.02%               |
| <i>TP53</i>        | 4.69       | 2.67-8.35               | 2.11e-09                      | 64                 | 87546               | 0.07%               | 16              | 102541              | 0.02%               |
| Black              |            |                         |                               |                    |                     |                     |                 |                     |                     |
| <i>ATM</i>         | 3.58       | 1.87-7.21               | 0.000266                      | 28                 | 8318                | 0.34%               | 14              | 14846               | 0.09%               |
| <i>BARD1</i>       | 6.59       | 2.34-18.68              | 0.000211                      | 17                 | 7508                | 0.23%               | 5               | 14535               | 0.03%               |
| <i>BRCA1</i>       | 27.11      | 13-58.75                | 1.11e-41                      | 141                | 11178               | 1.26%               | 7               | 14864               | 0.05%               |
| <i>BRCA2</i>       | 14.52      | 8.36-25.32              | 4.2e-39                       | 153                | 11178               | 1.37%               | 14              | 14661               | 0.1%                |
| <i>BRIP1</i>       | 1.73       | 0.84-3.71               | 0.268                         | 14                 | 7528                | 0.19%               | 16              | 14850               | 0.11%               |
| <i>CDH1</i>        | ND         | ND                      | ND                            | 5                  | 10908               | 0.05%               | 1               | 14414               | 0.01%               |
| <i>CDKN2A</i>      | ND         | ND                      | ND                            | 1                  | 2232                | 0.04%               | 2               | 13449               | 0.01%               |
| <i>CHEK2*</i>      | 1.55       | 0.59-4.33               | 0.529                         | 8                  | 8306                | 0.1%                | 9               | 14485               | 0.06%               |
| <i>MLH1</i>        | ND         | ND                      | ND                            | 1                  | 4206                | 0.02%               | 3               | 14801               | 0.02%               |

|               |      |            |          |    |       |       |    |       |       |
|---------------|------|------------|----------|----|-------|-------|----|-------|-------|
| <i>MRE11A</i> | ND   | ND         | ND       | 11 | 7508  | 0.15% | 3  | 14873 | 0.02% |
| <i>MSH2</i>   | ND   | ND         | ND       | 1  | 4206  | 0.02% | 0  | 14568 | 0%    |
| <i>MSH6</i>   | ND   | ND         | ND       | 3  | 4206  | 0.07% | 7  | 14533 | 0.05% |
| <i>NBN</i>    | ND   | ND         | ND       | 1  | 7508  | 0.01% | 8  | 14779 | 0.05% |
| <i>NFI</i>    | ND   | ND         | ND       | 6  | 7420  | 0.08% | 3  | 14760 | 0.02% |
| <i>PALB2</i>  | 5.89 | 3.14-11.18 | 2.13e-09 | 46 | 8950  | 0.51% | 13 | 14846 | 0.09% |
| <i>PTEN</i>   | ND   | ND         | ND       | 7  | 11186 | 0.06% | 0  | 14688 | 0%    |
| <i>RAD50</i>  | 1.36 | 0.56-3.17  | 0.558    | 9  | 7508  | 0.12% | 13 | 14731 | 0.09% |
| <i>RAD51C</i> | ND   | ND         | ND       | 8  | 7528  | 0.11% | 4  | 14856 | 0.03% |
| <i>RAD51D</i> | ND   | ND         | ND       | 5  | 7440  | 0.07% | 3  | 14833 | 0.02% |
| <i>TP53</i>   | ND   | ND         | ND       | 11 | 11208 | 0.1%  | 1  | 14828 | 0.01% |

Hispanic

|               |       |             |          |     |      |       |    |       |       |
|---------------|-------|-------------|----------|-----|------|-------|----|-------|-------|
| <i>ATM</i>    | 2.54  | 1.62-3.96   | 0.000317 | 29  | 6112 | 0.47% | 64 | 34167 | 0.19% |
| <i>BARD1</i>  | 7.29  | 2.81-18.48  | 8.47e-05 | 11  | 5608 | 0.2%  | 9  | 33414 | 0.03% |
| <i>BRCA1</i>  | 18.16 | 11.45-29.23 | 4.36e-46 | 96  | 8312 | 1.15% | 22 | 34214 | 0.06% |
| <i>BRCA2</i>  | 5.95  | 4.35-8.14   | 1.36e-28 | 101 | 8312 | 1.22% | 69 | 33442 | 0.21% |
| <i>BRIP1</i>  | 2.86  | 1.17-6.6    | 0.0331   | 8   | 5624 | 0.14% | 17 | 34188 | 0.05% |
| <i>CDH1</i>   | ND    | ND          | ND       | 3   | 8128 | 0.04% | 0  | 33665 | 0%    |
| <i>CDKN2A</i> | ND    | ND          | ND       | 0   | 1592 | 0%    | 2  | 33874 | 0.01% |
| <i>CHEK2*</i> | 2.9   | 1.46-5.82   | 0.0121   | 13  | 6106 | 0.21% | 25 | 34013 | 0.07% |
| <i>MLH1</i>   | ND    | ND          | ND       | 2   | 3256 | 0.06% | 4  | 34057 | 0.01% |
| <i>MRE11A</i> | ND    | ND          | ND       | 1   | 5608 | 0.02% | 13 | 34210 | 0.04% |
| <i>MSH2</i>   | ND    | ND          | ND       | 2   | 3256 | 0.06% | 2  | 33819 | 0.01% |
| <i>MSH6</i>   | ND    | ND          | ND       | 2   | 3256 | 0.06% | 16 | 33665 | 0.05% |
| <i>NBN</i>    | ND    | ND          | ND       | 4   | 5608 | 0.07% | 9  | 34171 | 0.03% |
| <i>NFI</i>    | ND    | ND          | ND       | 3   | 5524 | 0.05% | 10 | 34057 | 0.03% |
| <i>PALB2</i>  | 5.98  | 3.46-10.14  | 1.04e-09 | 30  | 6630 | 0.45% | 26 | 34220 | 0.08% |
| <i>PTEN</i>   | ND    | ND          | ND       | 4   | 8334 | 0.05% | 2  | 34072 | 0.01% |
| <i>RAD50</i>  | 1.01  | 0.45-2.29   | 1        | 7   | 5608 | 0.12% | 42 | 34124 | 0.12% |
| <i>RAD51C</i> | ND    | ND          | ND       | 11  | 5624 | 0.2%  | 4  | 34218 | 0.01% |
| <i>RAD51D</i> | ND    | ND          | ND       | 2   | 5540 | 0.04% | 3  | 34199 | 0.01% |
| <i>TP53</i>   | ND    | ND          | ND       | 9   | 8348 | 0.11% | 1  | 34234 | 0%    |

Asian

|              |      |           |       |    |      |       |    |       |       |
|--------------|------|-----------|-------|----|------|-------|----|-------|-------|
| <i>ATM</i>   | 1.41 | 0.74-2.5  | 0.468 | 13 | 5044 | 0.26% | 88 | 48103 | 0.18% |
| <i>BARD1</i> | 4.11 | 1.61-9.99 | 0.018 | 7  | 4722 | 0.15% | 17 | 47051 | 0.04% |

|               |       |            |          |    |      |       |    |       |       |
|---------------|-------|------------|----------|----|------|-------|----|-------|-------|
| <i>BRCA1</i>  | 7.96  | 5.37-11.66 | 7.62e-23 | 56 | 6562 | 0.85% | 52 | 48167 | 0.11% |
| <i>BRCA2</i>  | 8.08  | 5.66-11.42 | 8.22e-28 | 69 | 6562 | 1.05% | 62 | 47204 | 0.13% |
| <i>BRIP1</i>  | ND    | ND         | ND       | 1  | 4736 | 0.02% | 35 | 48112 | 0.07% |
| <i>CDH1</i>   | ND    | ND         | ND       | 4  | 6462 | 0.06% | 3  | 47304 | 0.01% |
| <i>CDKN2A</i> | ND    | ND         | ND       | 0  | 1246 | 0%    | 1  | 47371 | 0%    |
| <i>CHEK2*</i> | 0.97  | 0.37-2.4   | 1        | 5  | 5048 | 0.1%  | 49 | 47861 | 0.1%  |
| <i>MLH1</i>   | ND    | ND         | ND       | 4  | 2930 | 0.14% | 11 | 47991 | 0.02% |
| <i>MRE11A</i> | ND    | ND         | ND       | 4  | 4722 | 0.08% | 22 | 48177 | 0.05% |
| <i>MSH2</i>   | ND    | ND         | ND       | 1  | 2930 | 0.03% | 3  | 47576 | 0.01% |
| <i>MSH6</i>   | ND    | ND         | ND       | 0  | 2930 | 0%    | 26 | 47407 | 0.05% |
| <i>NBN</i>    | ND    | ND         | ND       | 2  | 4722 | 0.04% | 19 | 48098 | 0.04% |
| <i>NFI</i>    | ND    | ND         | ND       | 2  | 4666 | 0.04% | 5  | 47938 | 0.01% |
| <i>PALB2</i>  | 11.16 | 6.46-19.7  | 3.6e-15  | 29 | 5468 | 0.53% | 23 | 48166 | 0.05% |
| <i>PTEN</i>   | ND    | ND         | ND       | 1  | 6582 | 0.02% | 5  | 47928 | 0.01% |
| <i>RAD50</i>  | 0.8   | 0.34-1.81  | 0.995    | 6  | 4722 | 0.13% | 76 | 47957 | 0.16% |
| <i>RAD51C</i> | ND    | ND         | ND       | 2  | 4736 | 0.04% | 24 | 48161 | 0.05% |
| <i>RAD51D</i> | ND    | ND         | ND       | 2  | 4680 | 0.04% | 14 | 48121 | 0.03% |
| <i>TP53</i>   | ND    | ND         | ND       | 8  | 6586 | 0.12% | 4  | 48184 | 0.01% |

ND: Not determined due to insufficient number of pathogenic variants in cases or controls (<5);

PV: pathogenic variant;

§: Copy number variants excluded from breast cancer cases;

#: Fishers exact test comparing frequency of PVs in breast cancer cases and gnomAD reference controls. PVs in *PMS2* excluded from analysis. Breast cancer patients reporting prior *BRCA1* and *BRCA2* and Lynch syndrome testing were excluded;

€: Adjusted for multiple testing by Benjamini-Hochberg method;

\*: Missense and low penetrance PVs in *CHEK2* excluded from analysis;

Supplementary Table 6: Associations with estrogen receptor positive breast cancer risk for pathogenic variants in cancer predisposition genes by race and ethnicity<sup>#</sup>

| Gene          | Non-Hispanic White |            |                               | Black      |            |                               | Hispanic   |            |                               | Asian      |            |                               |
|---------------|--------------------|------------|-------------------------------|------------|------------|-------------------------------|------------|------------|-------------------------------|------------|------------|-------------------------------|
|               | Odds Ratio         | 95% CI     | Adjusted p-value <sup>€</sup> | Odds Ratio | 95% CI     | Adjusted p-value <sup>€</sup> | Odds Ratio | 95% CI     | Adjusted p-value <sup>€</sup> | Odds Ratio | 95% CI     | Adjusted p-value <sup>€</sup> |
| <i>ATM</i>    | 2.95               | 2.43-3.55  | 1.02e-27                      | 5.52       | 2.73-11.08 | 9.55e-06                      | 2.85       | 1.59-5.02  | 0.00242                       | 2.11       | 1.07-3.99  | 0.104                         |
| <i>BARD1</i>  | 1.49               | 0.87-2.48  | 0.22                          | ND         | ND         | ND                            | ND         | ND         | ND                            | ND         | ND         | ND                            |
| <i>BRCA1</i>  | 3.36               | 2.62-4.32  | 1.42e-21                      | 9.63       | 4.05-23.51 | 6.63e-08                      | 8.41       | 4.54-15.59 | 7.91e-10                      | 5.3        | 3.07-8.9   | 1.44e-07                      |
| <i>BRCA2</i>  | 5.43               | 4.5-6.56   | 4.02e-79                      | 11.72      | 6.38-21.74 | 1.1e-19                       | 6.6        | 4.61-9.45  | 4.88e-20                      | 8.12       | 5.43-12.2  | 9.74e-18                      |
| <i>BRIP1</i>  | 1.36               | 0.96-1.91  | 0.144                         | 1.98       | 0.77-4.96  | 0.336                         | ND         | ND         | ND                            | ND         | ND         | ND                            |
| <i>CDH1</i>   | 6.98               | 2.81-17.82 | 1.53e-05                      | ND         | ND         | ND                            | ND         | ND         | ND                            | ND         | ND         | ND                            |
| <i>CDKN2A</i> | ND                 | ND         | ND                            | ND         | ND         | ND                            | ND         | ND         | ND                            | ND         | ND         | ND                            |
| <i>CHEK2*</i> | 2.44               | 2.08-2.86  | 4.21e-26                      | 3.08       | 1.04-9.01  | 0.093                         | 4.98       | 2.43-10.14 | 0.000449                      | ND         | ND         | ND                            |
| <i>MLH1</i>   | ND                 | ND         | ND                            | ND         | ND         | ND                            | ND         | ND         | ND                            | ND         | ND         | ND                            |
| <i>MRE11A</i> | 1.03               | 0.57-1.87  | 0.927                         | ND         | ND         | ND                            | ND         | ND         | ND                            | ND         | ND         | ND                            |
| <i>MSH2</i>   | ND                 | ND         | ND                            | ND         | ND         | ND                            | ND         | ND         | ND                            | ND         | ND         | ND                            |
| <i>MSH6</i>   | 1.82               | 1.1-3.03   | 0.0451                        | ND         | ND         | ND                            | ND         | ND         | ND                            | ND         | ND         | ND                            |
| <i>NBN</i>    | 1.96               | 1.32-2.87  | 0.00202                       | ND         | ND         | ND                            | ND         | ND         | ND                            | ND         | ND         | ND                            |
| <i>NF1</i>    | 3.08               | 1.56-6.07  | 0.004                         | ND         | ND         | ND                            | ND         | ND         | ND                            | ND         | ND         | ND                            |
| <i>PALB2</i>  | 4.22               | 3.21-5.6   | 5.5e-25                       | 8.08       | 4.13-15.73 | 1.1e-09                       | 6.06       | 3.12-11.62 | 5.87e-06                      | 10.92      | 5.72-21.41 | 2.81e-09                      |
| <i>PTEN</i>   | 8.19               | 2.71-26.82 | 6.9e-05                       | ND         | ND         | ND                            | ND         | ND         | ND                            | ND         | ND         | ND                            |
| <i>RAD50</i>  | 1.16               | 0.82-1.64  | 0.559                         | 1.73       | 0.59-5.06  | 0.471                         | ND         | ND         | ND                            | 1.19       | 0.45-2.94  | 0.951                         |
| <i>RAD51C</i> | 0.96               | 0.54-1.65  | 1                             | ND         | ND         | ND                            | ND         | ND         | ND                            | ND         | ND         | ND                            |
| <i>RAD51D</i> | 1.23               | 0.55-2.59  | 0.698                         | ND         | ND         | ND                            | ND         | ND         | ND                            | ND         | ND         | ND                            |
| <i>TP53</i>   | 4.26               | 2.3-7.95   | 5.2e-06                       | ND         | ND         | ND                            | ND         | ND         | ND                            | 16.33      | 4.39-64.39 | 0.0009                        |

ND: Not determined due to insufficient number of pathogenic variants (PVs);

<sup>#</sup>: Fishers exact test comparing frequency of PVs in breast cancer cases and gnomAD reference controls. PVs in *PMS2* excluded from analysis. Breast cancer patients reporting prior *BRCA1* and *BRCA2* and Lynch syndrome testing were excluded;

<sup>€</sup>: Adjusted for multiple testing by Benjamini-Hochberg method;

\*: Missense and low penetrance PVs in *CHEK2* excluded from analysis

Supplementary Table 7: Associations with estrogen receptor negative breast cancer risk for pathogenic variants in cancer predisposition genes by race and ethnicity<sup>#</sup>

| Gene          | Non-Hispanic White |             |                               | Black      |             |                               | Hispanic   |             |                               | Asian      |             |                               |
|---------------|--------------------|-------------|-------------------------------|------------|-------------|-------------------------------|------------|-------------|-------------------------------|------------|-------------|-------------------------------|
|               | Odds Ratio         | 95% CI      | Adjusted p-value <sup>€</sup> | Odds Ratio | 95% CI      | Adjusted p-value <sup>€</sup> | Odds Ratio | 95% CI      | Adjusted p-value <sup>€</sup> | Odds Ratio | 95% CI      | Adjusted p-value <sup>€</sup> |
| <i>ATM</i>    | 1.25               | 0.84-1.84   | 0.344                         | ND         | ND          | ND                            | ND         | ND          | ND                            | ND         | ND          | ND                            |
| <i>BARD1</i>  | 6.55               | 3.99-10.51  | 1.24e-11                      | 12.97      | 4.26-39.33  | 1.93e-05                      | 16.12      | 5.22-49.15  | 0.000322                      | 18.61      | 6.56-52.84  | 9.8e-05                       |
| <i>BRCA1</i>  | 21.82              | 17.39-27.42 | 4.02e-187                     | 56.68      | 26.3-124.11 | 1.92e-54                      | 43.56      | 26.15-74.91 | 7.62e-43                      | 20.64      | 12.48-34.02 | 2.64e-19                      |
| <i>BRCA2</i>  | 6.53               | 5.16-8.23   | 4.16e-49                      | 13.94      | 7.54-26.44  | 3.41e-20                      | 5.33       | 3.05-8.97   | 1e-06                         | 7.28       | 3.6-14.48   | 2.49e-05                      |
| <i>BRIP1</i>  | 1.79               | 1.09-2.94   | 0.0545                        | ND         | ND          | ND                            | ND         | ND          | ND                            | ND         | ND          | ND                            |
| <i>CDH1</i>   | ND                 | ND          | ND                            | ND         | ND          | ND                            | ND         | ND          | ND                            | ND         | ND          | ND                            |
| <i>CDKN2A</i> | ND                 | ND          | ND                            | ND         | ND          | ND                            | ND         | ND          | ND                            | ND         | ND          | ND                            |
| <i>CHEK2*</i> | 0.87               | 0.6-1.27    | 0.561                         | ND         | ND          | ND                            | ND         | ND          | ND                            | ND         | ND          | ND                            |
| <i>MLH1</i>   | ND                 | ND          | ND                            | ND         | ND          | ND                            | ND         | ND          | ND                            | ND         | ND          | ND                            |
| <i>MRE11A</i> | 1.15               | 0.43-2.88   | 0.801                         | ND         | ND          | ND                            | ND         | ND          | ND                            | ND         | ND          | ND                            |
| <i>MSH2</i>   | ND                 | ND          | ND                            | ND         | ND          | ND                            | ND         | ND          | ND                            | ND         | ND          | ND                            |
| <i>MSH6</i>   | 2.34               | 1.02-4.94   | 0.0545                        | ND         | ND          | ND                            | ND         | ND          | ND                            | ND         | ND          | ND                            |
| <i>NBN</i>    | 1.78               | 0.94-3.34   | 0.108                         | ND         | ND          | ND                            | ND         | ND          | ND                            | ND         | ND          | ND                            |
| <i>NF1</i>    | 7.24               | 3.35-15.72  | 1.19e-05                      | ND         | ND          | ND                            | ND         | ND          | ND                            | ND         | ND          | ND                            |
| <i>PALB2</i>  | 6.73               | 4.85-9.32   | 1.65e-24                      | 4.76       | 2.04-10.95  | 0.00173                       | 9.74       | 4.38-20.31  | 4.4e-06                       | 17.13      | 7.04-40.29  | 7.25e-06                      |
| <i>PTEN</i>   | ND                 | ND          | ND                            | ND         | ND          | ND                            | ND         | ND          | ND                            | ND         | ND          | ND                            |
| <i>RAD50</i>  | 1.34               | 0.79-2.26   | 0.344                         | ND         | ND          | ND                            | ND         | ND          | ND                            | ND         | ND          | ND                            |
| <i>RAD51C</i> | 1.95               | 0.98-3.75   | 0.0812                        | ND         | ND          | ND                            | ND         | ND          | ND                            | ND         | ND          | ND                            |
| <i>RAD51D</i> | 4.11               | 1.84-8.65   | 0.00197                       | ND         | ND          | ND                            | ND         | ND          | ND                            | ND         | ND          | ND                            |
| <i>TP53</i>   | 5                  | 2.26-10.82  | 0.000547                      | 22.17      | 3.1-516.63  | 0.00428                       | ND         | ND          | ND                            | ND         | ND          | ND                            |

ND: Not determined due to insufficient number (<5) of pathogenic variants (PVs);

<sup>#</sup>: Fishers exact test comparing frequency of PVs in breast cancer cases and gnomAD reference controls. PVs in *PMS2* excluded from analysis. Breast cancer patients reporting prior *BRCA1* and *BRCA2* and Lynch syndrome testing were excluded;

<sup>€</sup>: Adjusted for multiple testing by Benjamini-Hochberg method;

\*: Missense and low penetrance variants in *CHEK2* excluded from analysis

Supplementary Table 8: Absolute lifetime risk of breast cancer by gene and ethnicity<sup>#</sup>

| Gene         | Non-Hispanic White |      |      |      |      |      | Black            |      |      |      |      |      | Hispanic         |      |      |      |      |      | Asian            |       |      |      |      |      |
|--------------|--------------------|------|------|------|------|------|------------------|------|------|------|------|------|------------------|------|------|------|------|------|------------------|-------|------|------|------|------|
|              | <u>Age/years</u>   |      |      |      |      |      | <u>Age/years</u> |      |      |      |      |      | <u>Age/years</u> |      |      |      |      |      | <u>Age/years</u> |       |      |      |      |      |
|              | 30                 | 40   | 50   | 60   | 70   | 85   | 30               | 40   | 50   | 60   | 70   | 85   | 30               | 40   | 50   | 60   | 70   | 85   | 30               | 40    | 50   | 60   | 70   | 85   |
| <i>ATM</i>   | <0.01              | 0.02 | 0.06 | 0.13 | 0.21 | 0.30 | <0.01            | 0.03 | 0.08 | 0.16 | 0.24 | 0.32 | <0.01            | 0.01 | 0.03 | 0.07 | 0.11 | 0.16 | <0.01            | 0.01  | 0.03 | 0.05 | 0.09 | 0.12 |
| <i>BARD1</i> | <0.01              | 0.02 | 0.06 | 0.11 | 0.19 | 0.27 | 0.01             | 0.05 | 0.14 | 0.26 | 0.39 | 0.50 | <0.01            | 0.02 | 0.09 | 0.18 | 0.29 | 0.40 | <0.01            | 0.02  | 0.08 | 0.15 | 0.23 | 0.31 |
| <i>BRCA1</i> | 0.01               | 0.04 | 0.16 | 0.29 | 0.45 | 0.59 | 0.03             | 0.17 | 0.44 | 0.68 | 0.81 | 0.85 | 0.01             | 0.06 | 0.20 | 0.37 | 0.55 | 0.68 | <0.01            | 0.04  | 0.14 | 0.26 | 0.39 | 0.50 |
| <i>BRCA2</i> | <0.01              | 0.04 | 0.13 | 0.24 | 0.38 | 0.51 | 0.01             | 0.09 | 0.27 | 0.47 | 0.63 | 0.73 | <0.01            | 0.02 | 0.07 | 0.14 | 0.24 | 0.34 | <0.01            | 0.04  | 0.14 | 0.26 | 0.39 | 0.51 |
| <i>CHEK2</i> | <0.01              | 0.01 | 0.05 | 0.11 | 0.18 | 0.26 | <0.01            | 0.01 | 0.04 | 0.07 | 0.11 | 0.16 | <0.01            | 0.01 | 0.04 | 0.07 | 0.13 | 0.19 | <0.01            | <0.01 | 0.02 | 0.04 | 0.06 | 0.09 |
| <i>PALB2</i> | <0.01              | 0.03 | 0.11 | 0.20 | 0.33 | 0.45 | 0.01             | 0.04 | 0.13 | 0.24 | 0.36 | 0.46 | <0.01            | 0.02 | 0.07 | 0.15 | 0.24 | 0.34 | 0.01             | 0.05  | 0.19 | 0.34 | 0.50 | 0.62 |

<sup>#</sup>: Absolute lifetime risk of breast cancer (up to age 85) determined for genes with at least 5 pathogenic variants across all races/ethnicities;
